# Supplementary material for: New layered chromium chalcogenides CsLiCrSe2, RbLiCrS2 and CsLiCrS2: structures and properties
Source: Royal Society of Chemistry journal article supplement (doi:10.1039/c9dt03657a), 2019-01-01
Supplement: c9dt03657a1.pdf [file c9dt03657a1.pdf]

## Supplementary information

### New layered chromium chalcogenides CsLiCrSe<sub>2</sub>, RbLiCrS<sub>2</sub> and CsLiCrS<sub>2</sub>: structure and properties

Xiaoning Sun,<sup>a,b</sup> Yanpeng Song,<sup>a,b</sup> Jun Deng,<sup>a,b</sup> Shifeng Jin,<sup>\*a,c</sup> and Xiaolong Chen <sup>\*a,b,c,d</sup>

<sup>a</sup>Research and Development Center for Functional Crystals, Beijing National Laboratory for Condensed Matter Physics, Institute of Physics, Chinese Academy of Sciences, Beijing 100190, China.

<sup>b</sup>University of Chinese Academy of Sciences, Beijing 100049, China.

<sup>c</sup>School of Physical Sciences, University of Chinese Academy of Sciences, Beijing 101408, China

<sup>d</sup>Songshan Lake Materials Laboratory, Dongguan, Guangdong 523808, China.

Table S1 Summary of Rietveld refinement parameters for CsLiCrSe<sub>2</sub>, CsLiCrS<sub>2</sub> and RbLiCrS<sub>2</sub>.

|                                                           | CsLiCrSe <sub>2</sub> | CsLiCrS <sub>2</sub> | RbLiCrS <sub>2</sub> |
|-----------------------------------------------------------|-----------------------|----------------------|----------------------|
| Space group                                               |                       | I4/mmm (No. 139)     |                      |
| <i>a</i> (Å)                                              | 4.4185(2)             | 4.2678(1)            | 4.1799(2)            |
| <i>c</i> (Å)                                              | 13.8002(7)            | 13.2824(3)           | 12.9501(8)           |
| <i>V</i> (Å <sup>3</sup> )                                | 269.42(2)             | 241.93(1)            | 226.26(2)            |
| <i>R<sub>p</sub></i> (%)                                  | 5.84                  | 6.24                 | 4.36                 |
| <i>R<sub>wp</sub></i> (%)                                 | 7.38                  | 8.32                 | 5.59                 |
| <i>R<sub>exp</sub></i> (%)                                | 4.52                  | 4.93                 | 3.73                 |
| $\chi^2$                                                  | 2.67                  | 2.85                 | 2.25                 |
| <i>Ch</i> -Cr/Li- <i>Ch</i> (°)                           | 120.2(1) × 2          | 125.0(1) × 2         | 121.1(1) × 2         |
| <i>d</i> (Cr/Li- <i>Ch</i> ) (Å)                          | 104.35(5) × 4         | 102.30(5) × 4        | 103.96(6) × 4        |
| <i>d</i> (Cr/Li- <i>Ch</i> ) (Å)                          | 2.547(1) × 4          | 2.414(2) × 4         | 2.397(2) × 4         |
| A= Cs, Rb ( <i>x, y, z</i> )                              |                       | 2a (0, 0, 0)         |                      |
| A= Cs, Rb occupancy                                       |                       | 1                    |                      |
| A= Cs, Rb <i>U<sub>iso</sub></i> (Å <sup>2</sup> )        | 0.025(1)              | 0.0263(6)            | 0.0252(8)            |
| Cr/Li ( <i>x, y, z</i> )                                  |                       | 4d (0, 0.5, 0.25)    |                      |
| Cr/Li occupancy                                           |                       | 1                    |                      |
| Cr/Li <i>U<sub>iso</sub></i> (Å <sup>2</sup> )            | 0.055(2)              | 0.028(1)             | 0.044(1)             |
| <i>Ch</i> = Se, S ( <i>x, y, z</i> )                      | 4d (0, 0, 0.3419(2))  | 4d (0, 0, 0.3350(2)) | 4d (0, 0, 0.3407(3)) |
| <i>Ch</i> = Se, S occupancy                               |                       | 1                    |                      |
| <i>Ch</i> =Se, S <i>U<sub>iso</sub></i> (Å <sup>2</sup> ) | 0.021(1)              | 0.023(1)             | 0.029(1)             |

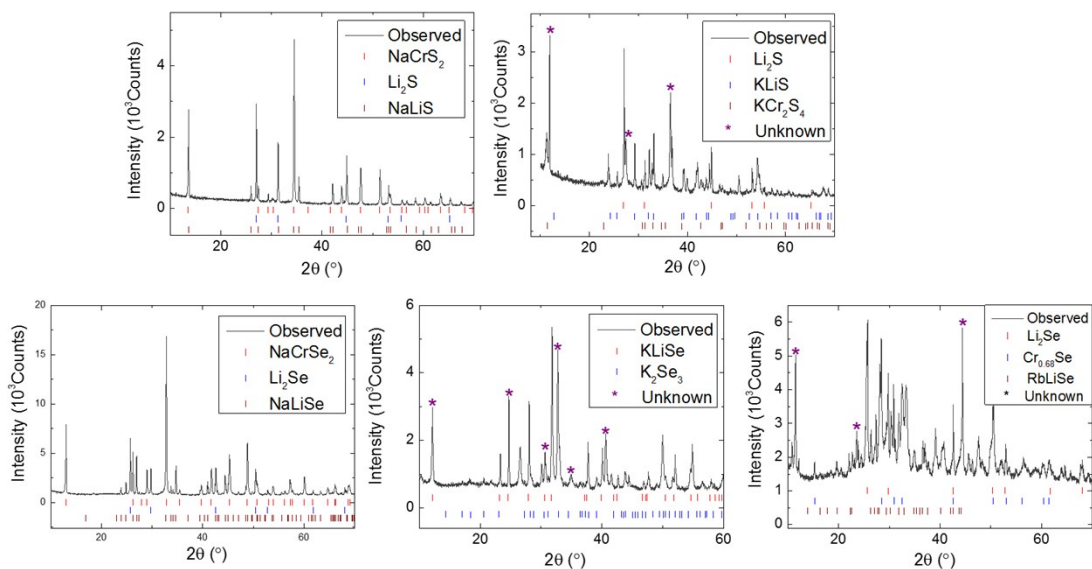

Fig S1 XRD patterns and the identified products for the failed reactions list in Table 1.

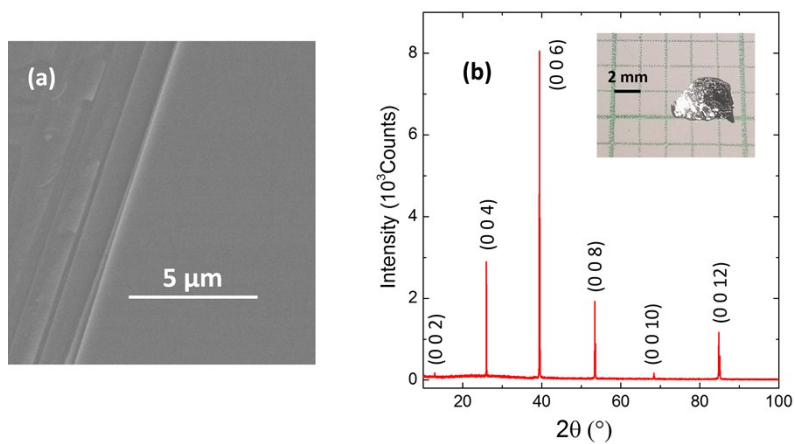

Fig S2 (a) Electron microscope image, (b) the XRD pattern and photograph of CsLiCrSe<sub>2</sub> single crystal (nominal).

Table S2 Chemical compositions, lattice parameters and spin-glass transition temperature in Cs(Li<sub>1-x</sub>Cr<sub>x</sub>)<sub>2</sub>Se<sub>2</sub>.

| Nominal formula                                                         | Formula from refinements                                                  | Formula from EDS & ICP-AES                                                                        | <i>a</i> (Å) | <i>c</i> (Å) | T <sub>S</sub> (K) |
|-------------------------------------------------------------------------|---------------------------------------------------------------------------|---------------------------------------------------------------------------------------------------|--------------|--------------|--------------------|
| Cs(Li <sub>0.55</sub> Cr <sub>0.45</sub> ) <sub>2</sub> Se <sub>2</sub> | Cs(Li <sub>0.552</sub> Cr <sub>0.448</sub> ) <sub>2</sub> Se <sub>2</sub> | Cs <sub>1.10(5)</sub> (Li <sub>0.62(3)</sub> Cr <sub>0.42(2)</sub> ) <sub>2</sub> Se <sub>2</sub> | 4.41603(18)  | 13.82173(65) | 8                  |
| Cs(Li <sub>0.5</sub> Cr <sub>0.5</sub> ) <sub>2</sub> Se <sub>2</sub>   | Cs(Li <sub>0.496</sub> Cr <sub>0.504</sub> ) <sub>2</sub> Se <sub>2</sub> | Cs <sub>1.08(5)</sub> (Li <sub>0.55(3)</sub> Cr <sub>0.50(3)</sub> ) <sub>2</sub> Se <sub>2</sub> | 4.41855(21)  | 13.80022(69) | 15                 |
| Cs(Li <sub>0.45</sub> Cr <sub>0.55</sub> ) <sub>2</sub> Se <sub>2</sub> | Cs(Li <sub>0.424</sub> Cr <sub>0.576</sub> ) <sub>2</sub> Se <sub>2</sub> | Cs <sub>0.97(5)</sub> (Li <sub>0.46(2)</sub> Cr <sub>0.59(3)</sub> ) <sub>2</sub> Se <sub>2</sub> | 4.43787(20)  | 13.72584(71) | 18                 |

Table S3 Comparison of lattice parameters, bond length *d*(M'/M-Ch) and bond angle β in AM'MCh<sub>2</sub>.

|                                    | <i>a</i> (Å) | <i>c</i> (Å) | <i>d</i> (M'/M-Ch) (Å) | β(°)       |
|------------------------------------|--------------|--------------|------------------------|------------|
| KLiFeSe <sub>2</sub> <sup>1</sup>  | 4.1044(2)    | 13.7194(9)   | 2.5050 (1)             | 110.020(2) |
| RbLiFeSe <sub>2</sub> <sup>1</sup> | 4.1609(1)    | 14.0420(5)   | 2.5218 (2)             | 111.172(1) |
| KCoCuS <sub>2</sub> <sup>2</sup>   | 3.8831(9)    | 13.058(1)    | 2.5198(4)              | 100.8019   |
| RbCoCuS <sub>2</sub> <sup>2</sup>  | 3.9314(5)    | 13.448(2)    | 2.5691(3)              | 99.8399    |
| CsCoCuS <sub>2</sub> <sup>2</sup>  | 3.9667(9)    | 13.833(4)    | 2.6313(5)              | 97.8348    |
| KLiMnS <sub>2</sub> <sup>3</sup>   | 4.070(3)     | 13.227(7)    | 2.439(4)               | 113.0(2)   |
| RbLiMnS <sub>2</sub> <sup>3</sup>  | 4.106(2)     | 13.579(6)    | 2.4765(9)              | 111.9888   |
| CsLiMnS <sub>2</sub> <sup>3</sup>  | 4.168(5)     | 14.006(9)    | 2.592(3)               | 107.0504   |
| KLiZnS <sub>2</sub> <sup>3</sup>   | 3.998(2)     | 13.262(6)    | 2.411(4)               | 111.9(2)   |
| RbLiZnS <sub>2</sub> <sup>3</sup>  | 4.046(2)     | 13.537(5)    | 2.4493(9)              | 111.37     |

1. D. D. Yuan, N. Liu, K. K. Li, S. F. Jin, J. G. Guo and X. L. Chen, *Inorg Chem*, 2017, **56**, 13187-13193.
2. M. Oledzka, J. G. Lee, K. V. Ramanujachary and M. Greenblatt, *J Solid State Chem*, 1996, **127**, 151-160.
3. D. Schmitz and W. Bronger, *Z Anorg Allg Chem*, 1987, **553**, 248-260.

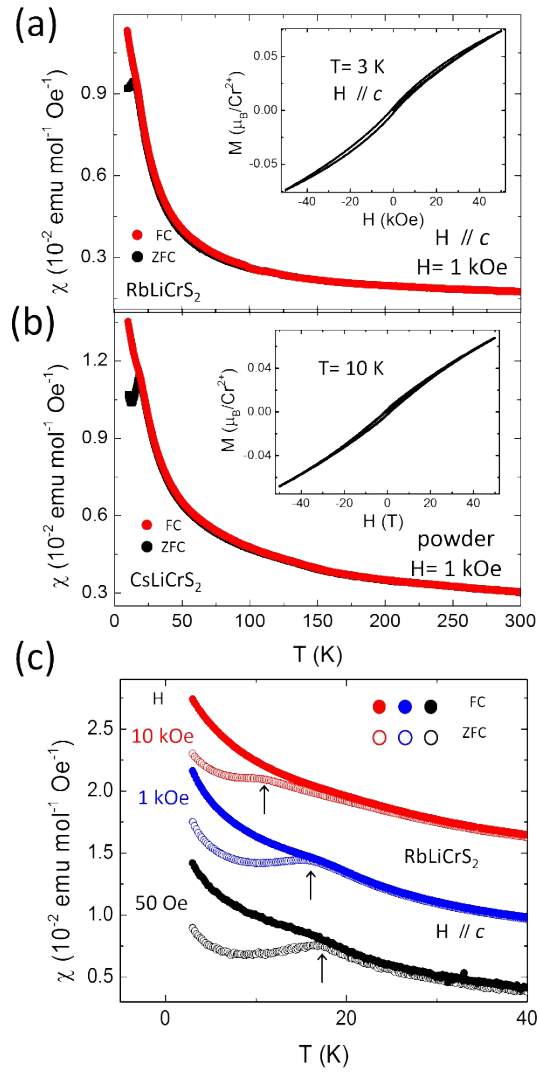

Fig S3 Zero-field-cooled (ZFC) and field-cooled (FC) susceptibilities of (a) RbLiCrS $_2$  single crystal for  $H // c$  axis and (b) CsLiCrS $_2$  powder sample at  $H = 1$  kOe. Insets show their  $M$ - $H$  curves, respectively. (c) ZFC and FC curves of RbLiCrS $_2$  single crystal under different magnetic fields.

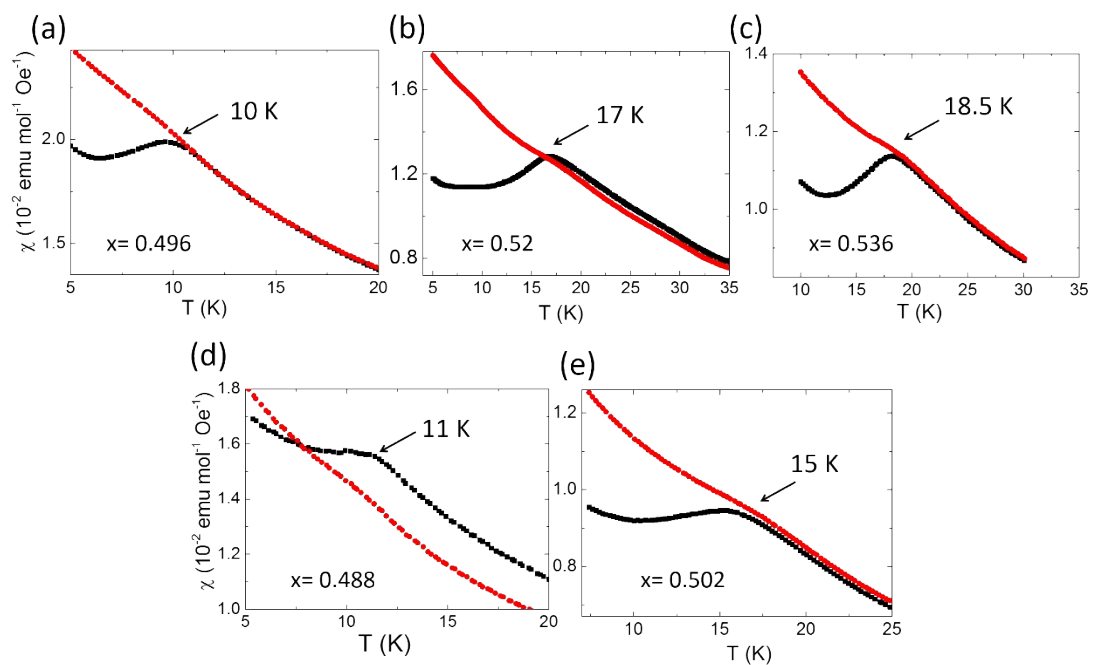

Fig S4 ZFC and FC curves of (a-c) Cs(Li $_{1-x}$ Cr $_x$ ) $_2$ S $_2$  and (d-e) Rb(Li $_{1-x}$ Cr $_x$ ) $_2$ S $_2$  with different  $x$ .  $x$  is obtained from Rietveld refinements.

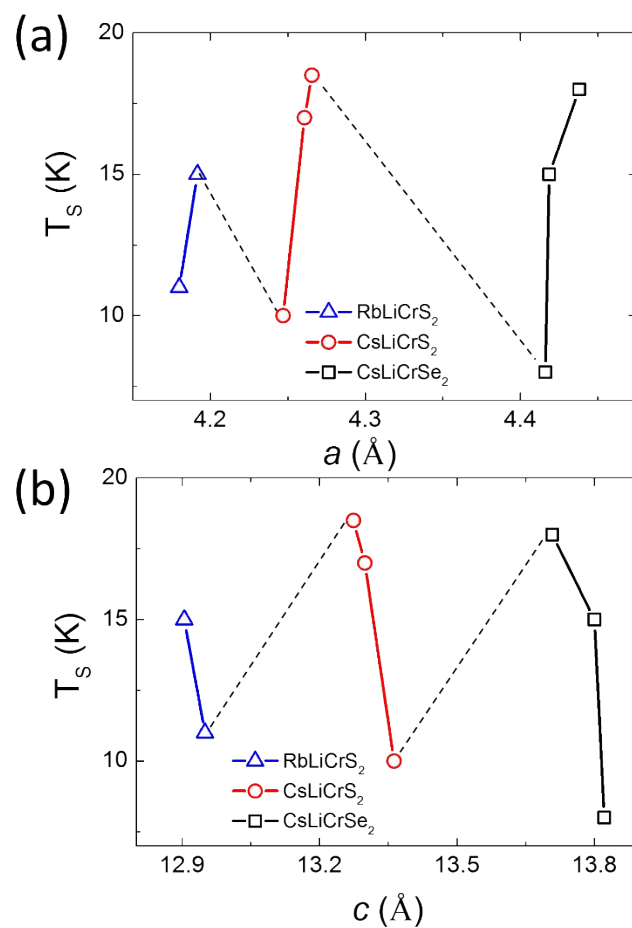

Fig S5  $T_s$  in  $A(\text{Li}_{1-x}\text{Cr}_x)_2\text{Ch}_2$  ( $A = \text{Cs, Rb}$ ,  $\text{Ch} = \text{S, Se}$ ) drawn against lattice parameter (a)  $a$  and (b)  $c$ .

Since the Cr concentration  $x$  affects both lattice parameters and the spin-glass temperature  $T_s$ , the relationship between lattice parameters and  $T_s$  can be established via  $x$  in  $\text{Cs}(\text{Li}_{1-x}\text{Cr}_x)_2\text{Se}_2$ ,  $\text{Cs}(\text{Li}_{1-x}\text{Cr}_x)_2\text{S}_2$  and  $\text{Rb}(\text{Li}_{1-x}\text{Cr}_x)_2\text{S}_2$ . As shown in Fig S6, higher  $T_s$  corresponds to larger  $a$  and smaller  $c$ . However, when the  $A(\text{Li}_{1-x}\text{Cr}_x)_2\text{Ch}_2$  system is considered as a whole,  $T_s$  shows no clear dependence on  $a$  or  $c$ .
